# Supplementary material for: HOXA5 confers tamoxifen resistance via the PI3K/AKT signaling pathway in ER-positive breast cancer
Source: PubMed Central journal article supplement (PMC8210559; doi:10.7150/jca.59740), 2021-06-01
Supplement: jcav12p4626s1.pdf [file jcav12p4626s1.pdf]

## **Supplementary Figures**

### **HOXA5 confers tamoxifen resistance via the PI3K/AKT signaling pathway in ER-positive breast cancer**

**Clara Yuri Kim<sup>1</sup>, Yu Cheon Kim<sup>1,2</sup>, Ji Hoon Oh<sup>1\*</sup>, and Myoung Hee Kim<sup>1\*</sup>**

*<sup>1</sup>Department of Anatomy, Embryology Laboratory, Yonsei University College of Medicine, Seoul 03722, Korea*

*<sup>2</sup>Department of Anatomy, Graduate School of Medical Science, Brain Korea 21 Project, Yonsei University College of Medicine, Seoul 03722, Korea*

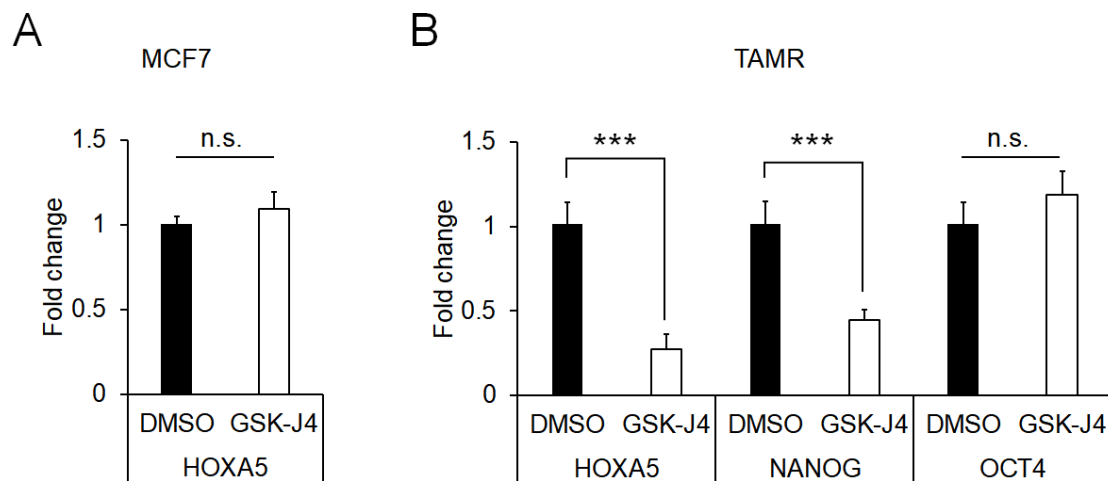

**Supplementary Figure S1. JMJD3/UTX regulate the expression levels of HOXA5 in TAMR cells.** (A-B) RT-qPCR analysis of HOXA5 in (A) MCF7 and (B) TAMR cells treated with GSK-J4 (JMJD3/UTX inhibitor; 5  $\mu$ M). NANOG was used as a positive control and OCT4 was used as a negative control to GSK-J4 treatment. GAPDH was used to normalize changes in each gene expression level. All experiments were performed in triplicate. \*\*\*  $p < 0.001$  compared with DMSO by Student's  $t$ -test.

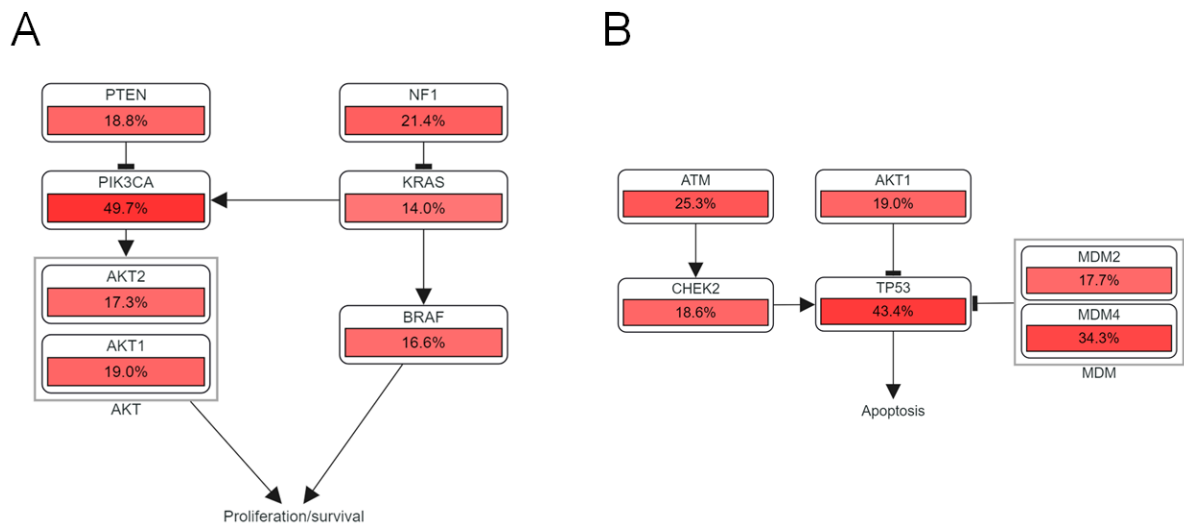

**Supplementary Figure S2. Signaling pathway associated with *HOXA5* alteration in breast cancer tissues.** (A) PI3K/AKT signaling pathway is associated with *HOXA5* alteration in breast cancer tissues retrieved from cBioPortal. (B) TP53 pathway is associated with *HOXA5* alteration in breast cancer tissues retrieved from cBioPortal.

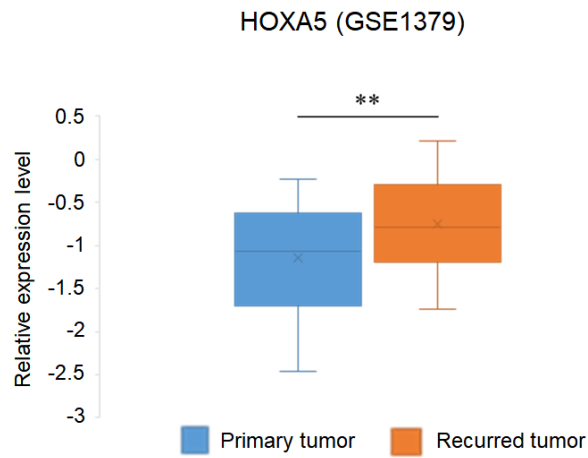

**Supplementary Figure S3.** Box plot of *HOXA5* expression in primary ER+ breast tumors and recurred tumors following tamoxifen mono-therapy for 5 yrs. Data were retrieved from GSE1379, a publicly available gene expression profiling data from 60 paired patients. \*\*  $p < 0.01$  compared with primary tumor by Student's *t*-test.
